# Supplementary material for: Characterization of Zebrafish Pax1b and Pax9 in Fin Bud Development
Source: Hindawi journal article supplement (doi:10.1155/2014/309385), 2014-01-01
Supplement: f1 [file 309385.f1.pdf]

## Supporting Information

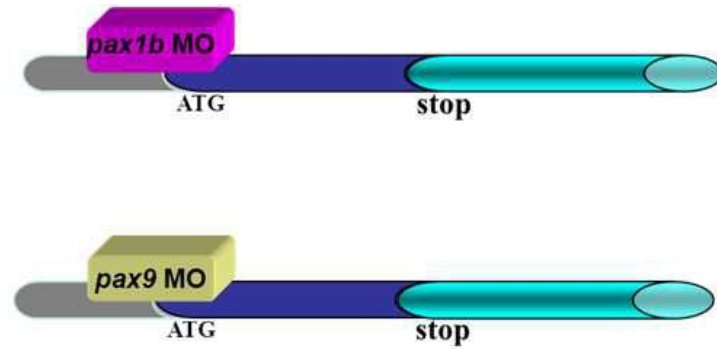

**Figure S1. Schematic diagram of *pax1b* and zebrafish *pax9* translation blockers.** The three-dimensional cubes represent two independent MOs and are not to scale.

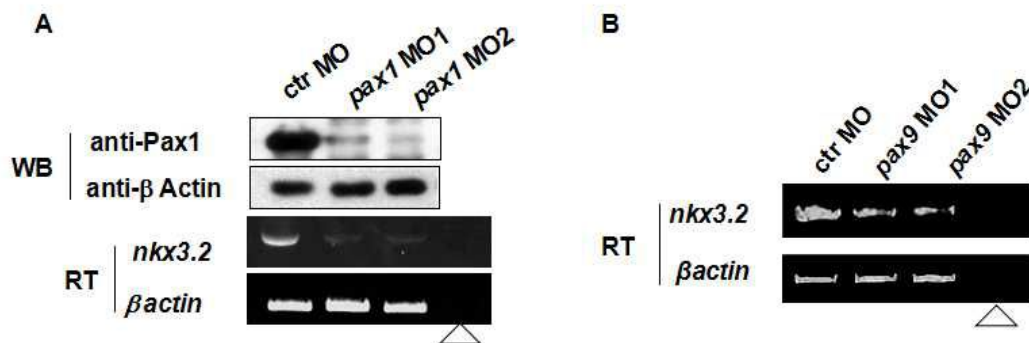

**Figure S2. *pax1b* and zebrafish *pax9* morpholino efficiency.** (A) Western blot and RT-PCR analysis demonstrated that *pax1b* morpholino disrupted the production of PAX1 and its target *nkx3.2* cDNA, respectively. (B) zebrafish *pax9* morpholino reduced the production of its target *nkx3.2* cDNA assessed by RT-PCR. The triangles indicate the negative control, using TE buffer without template.

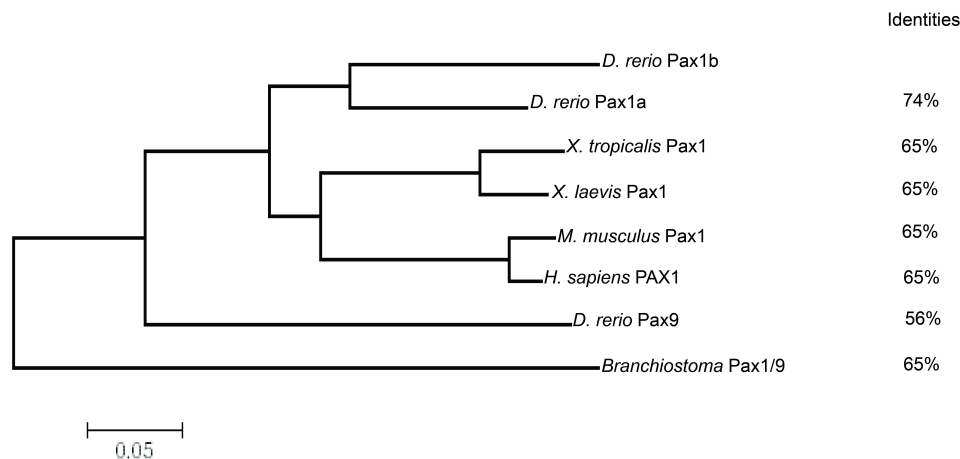

**Figure S3. Phylogenetic analysis of Pax1a, Pax1b and Pax9 proteins from following species: *Danio rerio*, *Xenopus tropicalis*, *Xenopus laevis*, *Mus musculus*, *Homo sapiens*, *Branchiostoma belcheri*.**

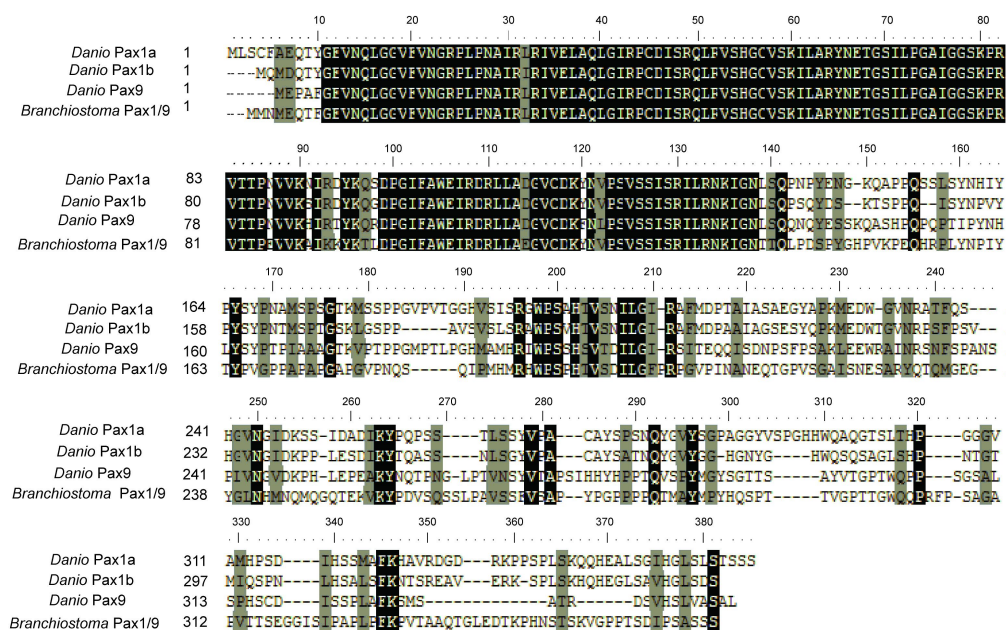

**Figure S4. Amino acid sequence alignment done with DNAssist software. Black boxes represent identical amino acid residues, and gray boxes represent conserved amino acid residues.**

**Supplemental Table 1. Primer sequences used in RT-PCR.**

| Primer Name             | Primer Sequences       | Fragment Length |
|-------------------------|------------------------|-----------------|
| <i>nkx3.2</i> forward   | atggctgtgcgcagtaactc   | 738             |
| <i>nkx3.2</i> reverse   | tcactggttccagagcaggc   |                 |
| <i>aggrecan</i> forward | gggggtccagaggagcaagc   | 519             |
| <i>aggrecan</i> reverse | ttagagtgtttctccaatgc   |                 |
| <i>col2a1a</i> forward  | ccattaggaccaccgggtgc   | 156             |
| <i>col2a1a</i> reverse  | aaatcctgacctggtgttgg   |                 |
| <i>actin</i> forward    | atggatgatgaaattgccgcac | 475             |
| <i>actin</i> reverse    | accatcaccagagtcctcacc  |                 |
